# Supplementary material for: FABP1 controls hepatic transport and biotransformation of Δ9-THC
Source: PubMed Central journal article supplement (PMC6527858; doi:10.1038/s41598-019-44108-3), 2019-05-20
Supplement: 41598_2019_44108_MOESM1_ESM.pdf [file 41598_2019_44108_MOESM1_ESM.pdf]

# FABP1 controls hepatic transport and biotransformation of $\Delta^9$ -THC

Matthew W. Elmes<sup>1,2,3,\*</sup>, Lauren E. Prentis<sup>4</sup>, Luke L. McGoldrick<sup>1</sup>,  
Christopher J. Giuliano<sup>1</sup>, Joseph M. Sweeney<sup>1</sup>, Olivia M. Joseph<sup>1</sup>, Joyce Che<sup>1</sup>,  
Gregory S. Carbonetti<sup>1,2,3</sup>, Keith Studholme<sup>2</sup>, Dale G. Deutsch<sup>1</sup>, Robert C. Rizzo<sup>4</sup>,  
Steven E. Glynn<sup>1</sup>, and Martin Kaczocha<sup>1,2,\*</sup>

<sup>1</sup>Department of Biochemistry and Cell Biology, Stony Brook University, Stony Brook, New York 11794, USA.

<sup>2</sup>Department of Anesthesiology, Stony Brook University, Stony Brook, New York 11794, USA.

<sup>3</sup>Graduate Program in Molecular and Cellular Biology, Stony Brook University, Stony Brook, New York 11794, USA.

<sup>4</sup>Department of Applied Mathematics and Statistics, Stony Brook University, Stony Brook, New York 11794, USA

\*Corresponding Author: Correspondence and requests for materials should be addressed to M.W.E. (matthew.elmes@stonybrook.edu) or M.K. (martin.kaczocha@stonybrook.edu).

## Supplementary Information

**Supplementary Table S1.** Crystallographic data collection and refinement statistics.

|                                                                |                                               |
|----------------------------------------------------------------|-----------------------------------------------|
| <i>Data Collection</i>                                         |                                               |
| Space Group                                                    | P2 <sub>1</sub> 2 <sub>1</sub> 2 <sub>1</sub> |
| Unit Cell Parameters (Å)                                       | a=79.2 b=79.3 c=234.6                         |
| Resolution (Å)                                                 | 40.52-2.50 (2.54-2.50)                        |
| Measured Reflections                                           | 422700                                        |
| Unique Reflections                                             | 51960                                         |
| Completeness (%)                                               | 100.0 (100.0)                                 |
| Multiplicity                                                   | 8.1 (7.9)                                     |
| $\langle I/\sigma I \rangle$                                   | 69.5 (1.9)                                    |
| R <sub>merge</sub>                                             | 0.089 (1.135)                                 |
| R <sub>meas</sub>                                              | 0.095 (1.214)                                 |
| CC <sub>1/2</sub> of highest resolution shell                  | 0.901                                         |
| <i>Refinement</i>                                              |                                               |
| Resolution (Å)                                                 | 40.38-2.50                                    |
| R <sub>work</sub> /R <sub>free</sub> (%)                       | 20.6/22.5                                     |
| No. of protein atoms                                           | 8634                                          |
| No. of waters                                                  | 305                                           |
| No. of ligand atoms                                            | 90                                            |
| R.m.s.d. bond lengths (Å)                                      | 0.004                                         |
| R.m.s.d. bond angles (°)                                       | 1.06                                          |
| Mean B factor (Å <sup>2</sup> )                                | 64.84                                         |
| Mean B factor for water (Å <sup>2</sup> )                      | 47.12                                         |
| Mean B factor for ligands (Å <sup>2</sup> )                    | 60.78                                         |
| Ramachandran Plot Statistics<br>Favored/Allowed/Disallowed (%) | 98.04/1.96/0.00                               |
| Molprobrity Score                                              | 1.72                                          |

**Supplementary Table S2.** *In vitro* activities and computationally predicted interaction energies for cannabinoids and THC metabolites to human FABP1.

| Compound Code | Experimental K <sub>i</sub> (μM) | Grid Score <sup>a</sup> (kcal/mol) | MM-GBSA Score <sup>b</sup> (kcal/mol) | ΔG <sub>HYD</sub> Ligand <sup>c</sup> (kcal/mol) |
|---------------|----------------------------------|------------------------------------|---------------------------------------|--------------------------------------------------|
| THC           | 2.93±0.27                        | -54.42                             | -25.33                                | -6.79                                            |
| 11-OH-THC     | 7.12±0.79                        | -57.29                             | -24.78                                | -14.04                                           |
| THC-COOH      | 11.2±0.7                         | -62.87                             | -16.76                                | -85.67                                           |
| AJA           | 26.0±3.8                         | -69.30                             | -8.70                                 | -85.13                                           |
| CBD           | 3.95±0.65                        | -58.28                             | -32.76                                | -9.22                                            |

<sup>a</sup>DOCK grid score = VDW + ES energy, <sup>b</sup>MM-GBSA score = VDW + ES energy + ΔΔG<sub>HYD</sub>,  
<sup>c</sup>ΔG<sub>HYD</sub> Ligand = ΔG<sub>POLAR</sub> + ΔG<sub>NONPOLAR</sub>.

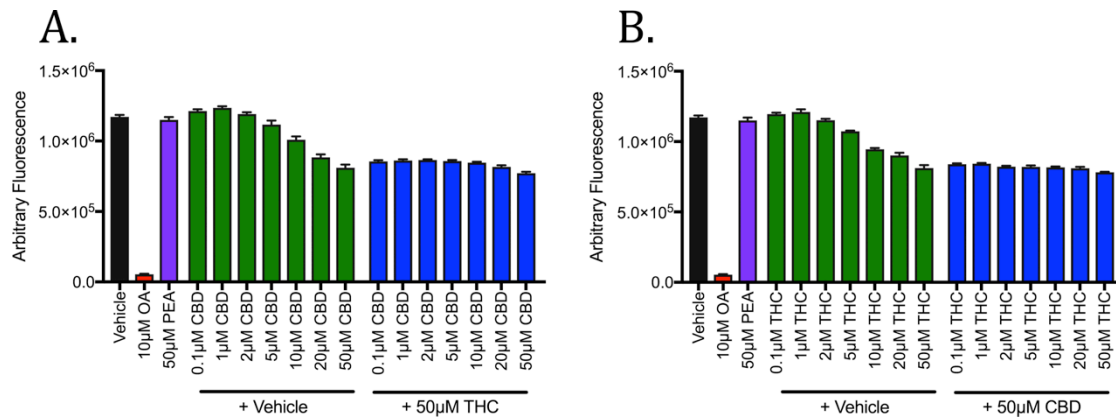

**Supplementary Figure S1.** FABP1 competitive binding assays. **(A)** DAUDA displacement from FABP binding pocket by CBD (0.1-50  $\mu$ M) in the presence or absence of 50  $\mu$ M THC. **(B)** DAUDA displacement by THC (0.1-50  $\mu$ M) in presence or absence of 50  $\mu$ M CBD. Assays include positive (oleic acid, 10  $\mu$ M) and negative (palmitoylethanolamide, 50  $\mu$ M) controls for probe displacement.

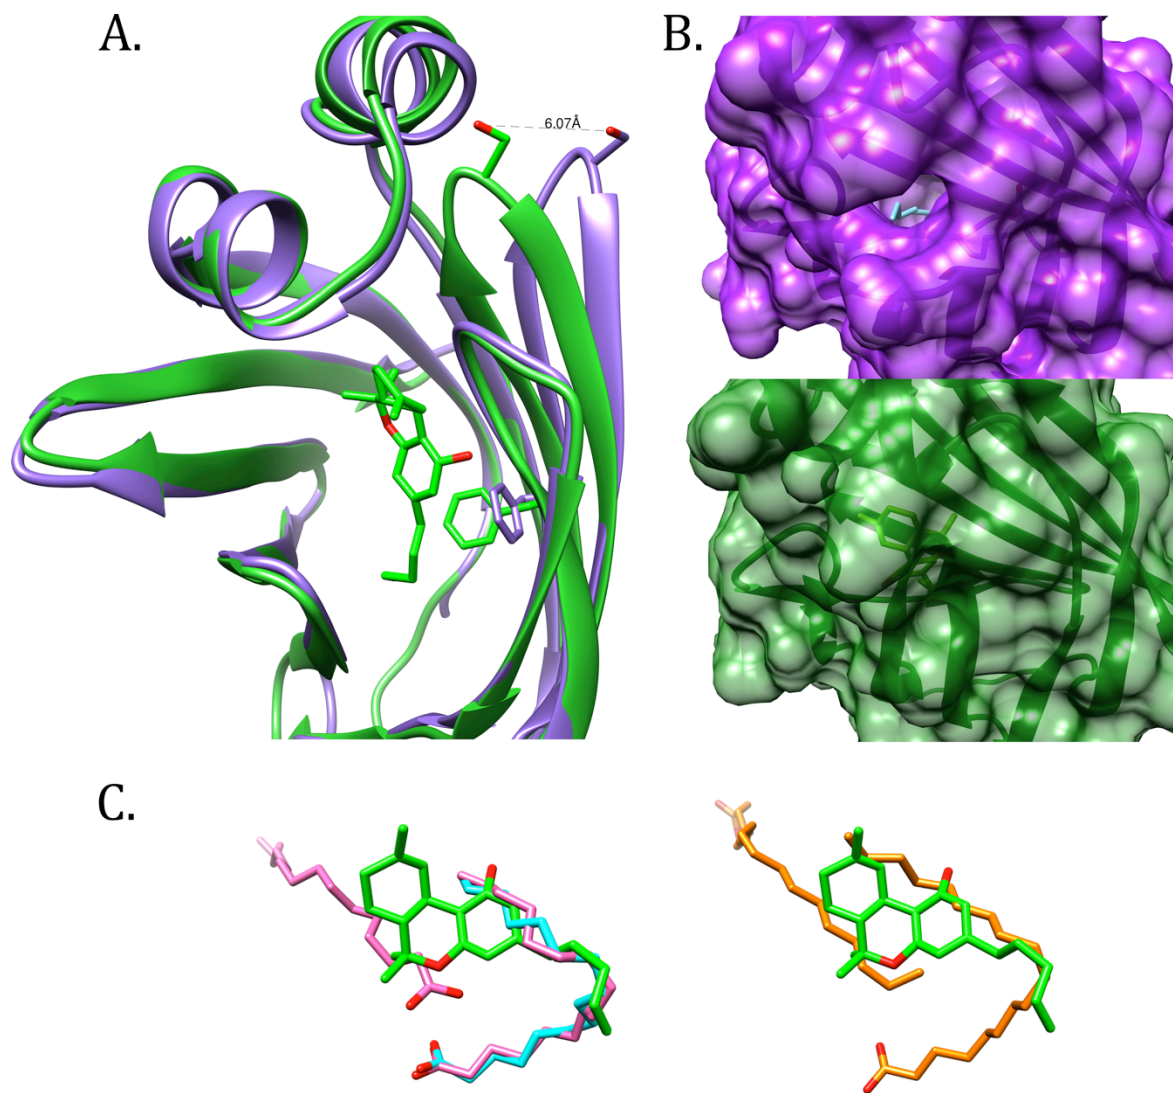

**Supplementary Figure S2.** Structure overlay between THC-bound FABP1 (PDB: 6MP4, green) and palmitic acid-bound FABP1 (PDB: 3STM, purple). **(A)** Large 6 Å movement of the  $\beta$ 3/ $\beta$ 4  $\beta$ -turn is observed in the THC-bound structure. **(B)** Surface views of 3STM and 6MP4 at identical angles depicts the FABP1 ligand entry portal closure when in complex with THC. **(C)** Comparison of THC (green) ligand binding pose with published palmitic acid-bound (left; blue, PDB: 3STM; pink, PDB: 3STK) and oleate-bound (right; orange, PDB: 2LKK) human FABP1 structures.

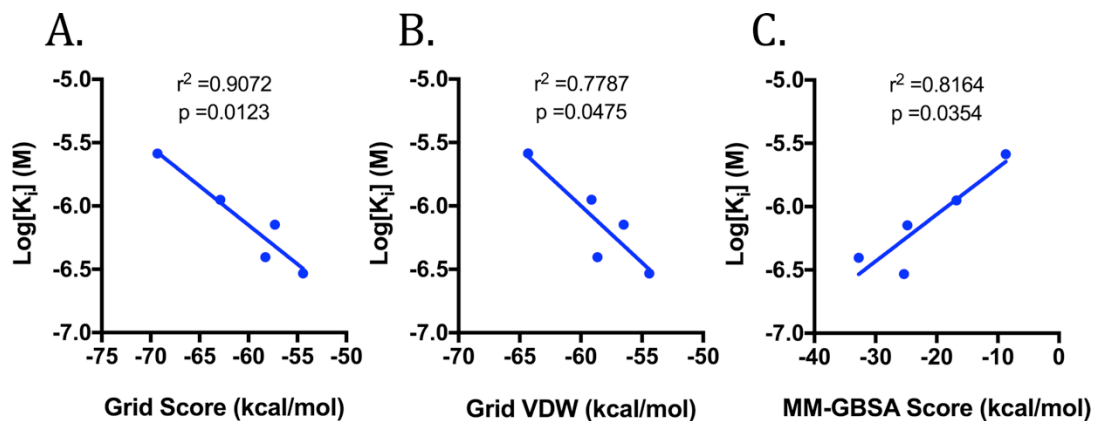

**Supplementary Figure S3.** Correlation analyses of computational predictions to experimentally determined affinities. **(A)** Grid score, **(B)** Grid van der Waals score, and **(C)** MM-GBSA score that includes desolvation penalties.

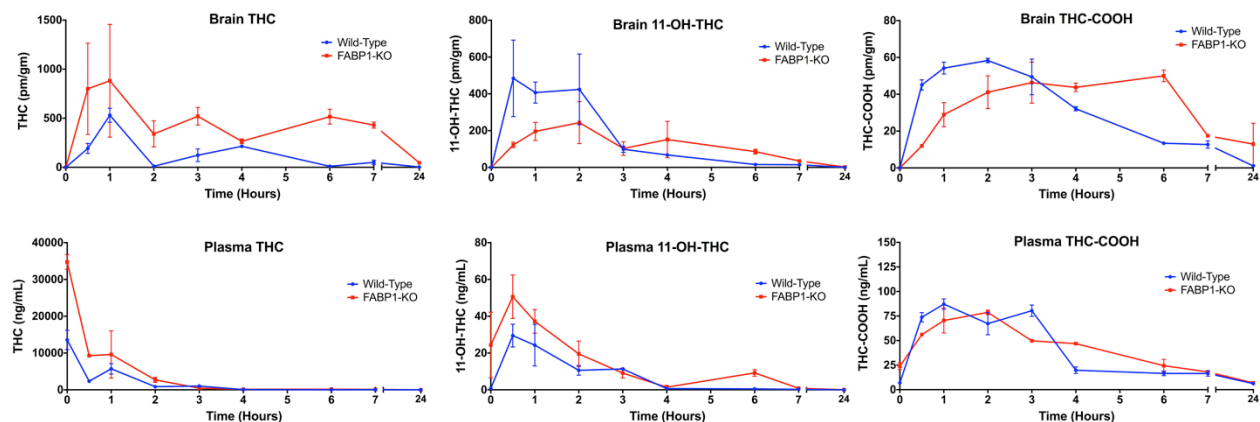

**Supplementary Figure S4.** THC pharmacokinetics in wild-type and FABP1-KO male mice. Brain **(A-C)** and plasma **(D-F)** levels of THC **(A,D)**, primary THC metabolite 11-OH-THC **(B,E)**, and secondary metabolite THC-COOH **(C,F)**, following administration of THC (10 mg/kg, i.p.).  $n = 4$  animals per group.
